# Supplementary material for: Interleukin 1 is a key driver of inflammatory bowel disease-demonstration in a murine IL-1Ra knockout model
Source: PubMed Central journal article supplement (PMC6544399; doi:10.18632/oncotarget.26894), 2019-05-28
Supplement: oncotarget-10-3559-s001.pdf [file oncotarget-10-3559-s001.pdf]

## Interleukin 1 is a key driver of inflammatory bowel disease-demonstration in a murine IL-1Ra knockout model

### SUPPLEMENTARY MATERIALS

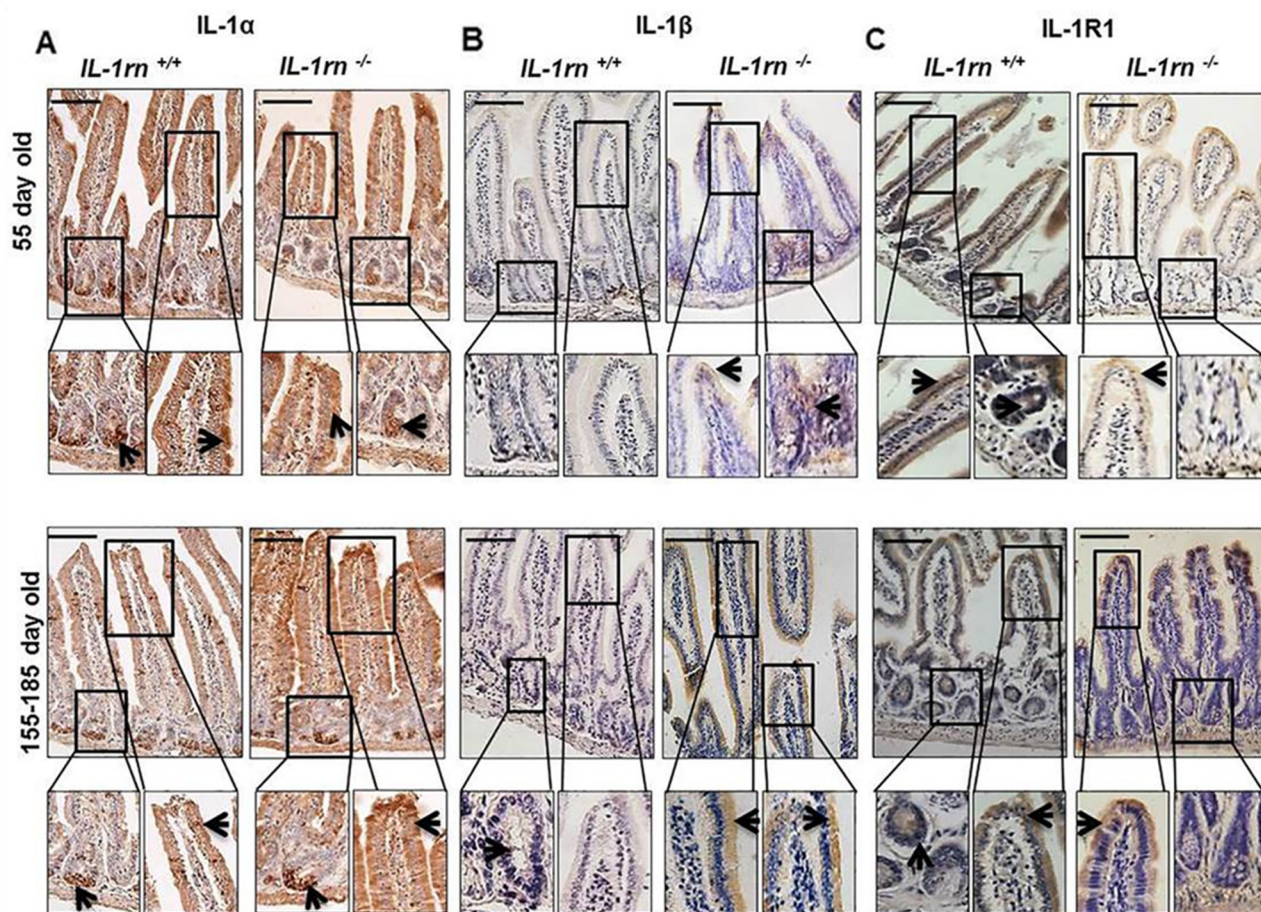

**Supplementary Figure 1: Immunohistochemistry staining of the expression and localisation of pro-inflammatory cytokines. (A) IL-1α; (B) IL-1β; (C) IL-1RI in the jejunum of the 55-day old and 155-185 day old IL-1m<sup>-/-</sup> mice compared with IL-1m<sup>+/+</sup> mice. Cell nuclei were stained with haematoxylin (blue). Black arrows indicate immunopositivity. Scale bar = 100µm.**



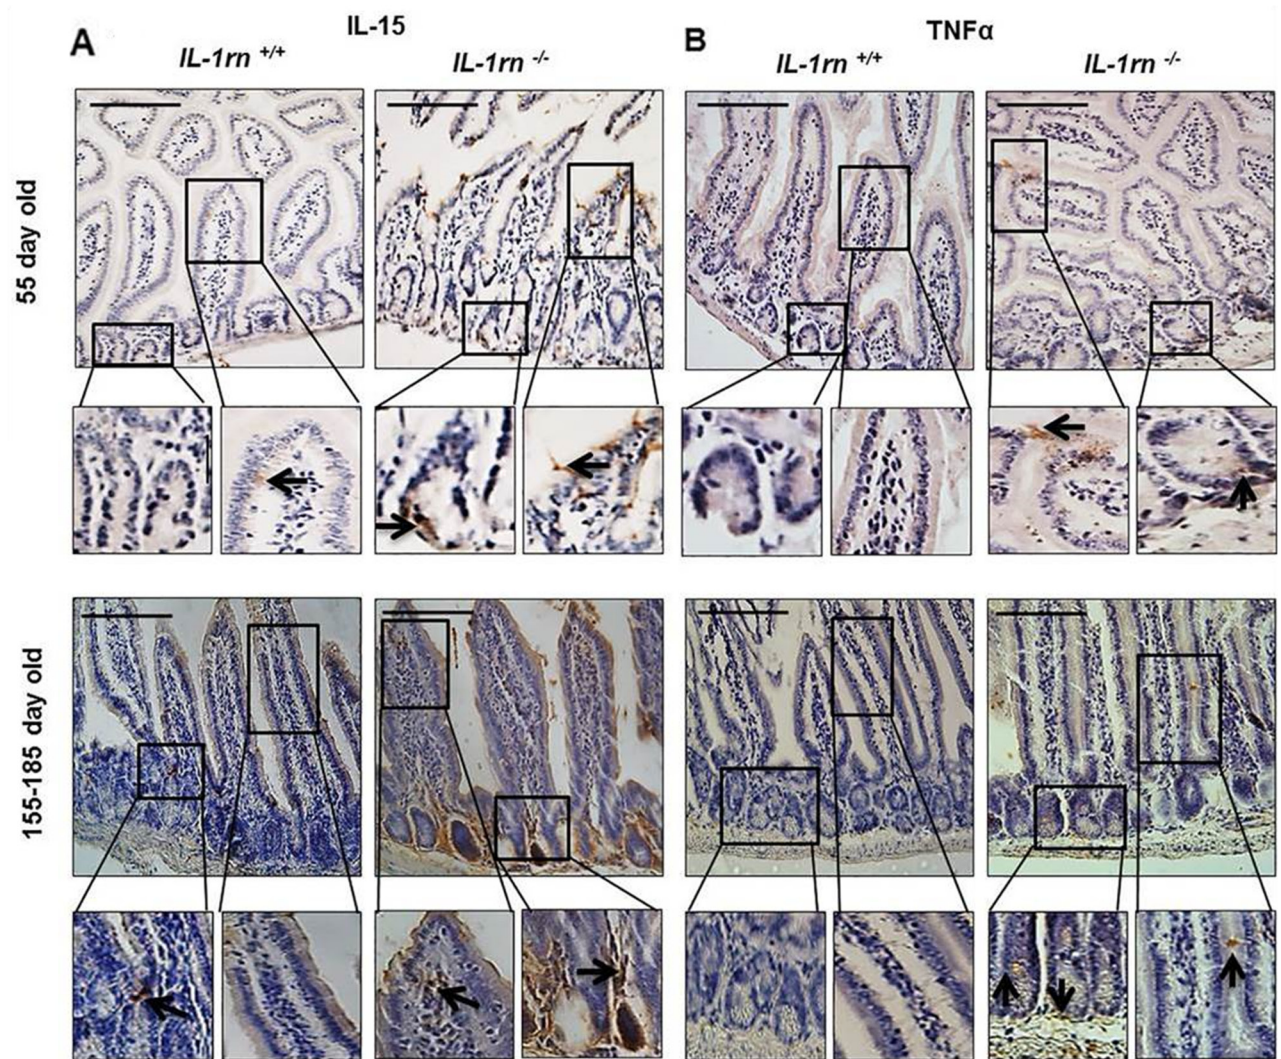

**Supplementary Figure 2: Immunohistochemistry staining of the expression and localisation of pro-inflammatory cytokines. (A) IL-15; (B) TNF $\alpha$  in the jejunum of the 55-day old and 155-185 day old *IL-1r<sup>-/-</sup>* mice compared with *IL-1r<sup>+/+</sup>* mice. Cell nuclei were stained with haematoxylin (blue). Black arrows indicate immunopositivity. Scale bar = 100 $\mu$ m.**

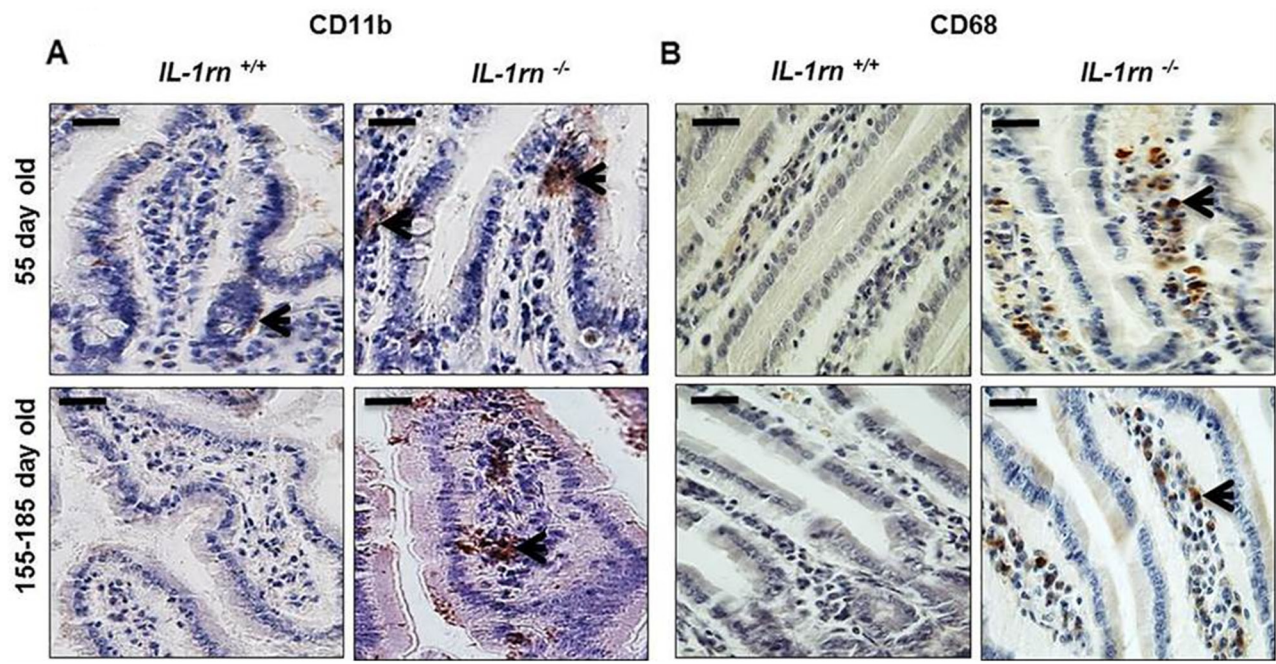

**Supplementary Figure 3: Immunohistochemistry staining of infiltrating cells.** (A) polymorphonuclear cells (PMNs) indicated by CD11b staining and (B) Macrophage cells (CD68) in the jejunum of the 55-day old and 155-185 day old *IL-1m*<sup>-/-</sup> mice compared with *IL-1m*<sup>+/+</sup> mice. Cell nuclei were stained with haematoxylin (blue). Black arrows indicate immunopositivity. Scale bar = 25 $\mu$ m.



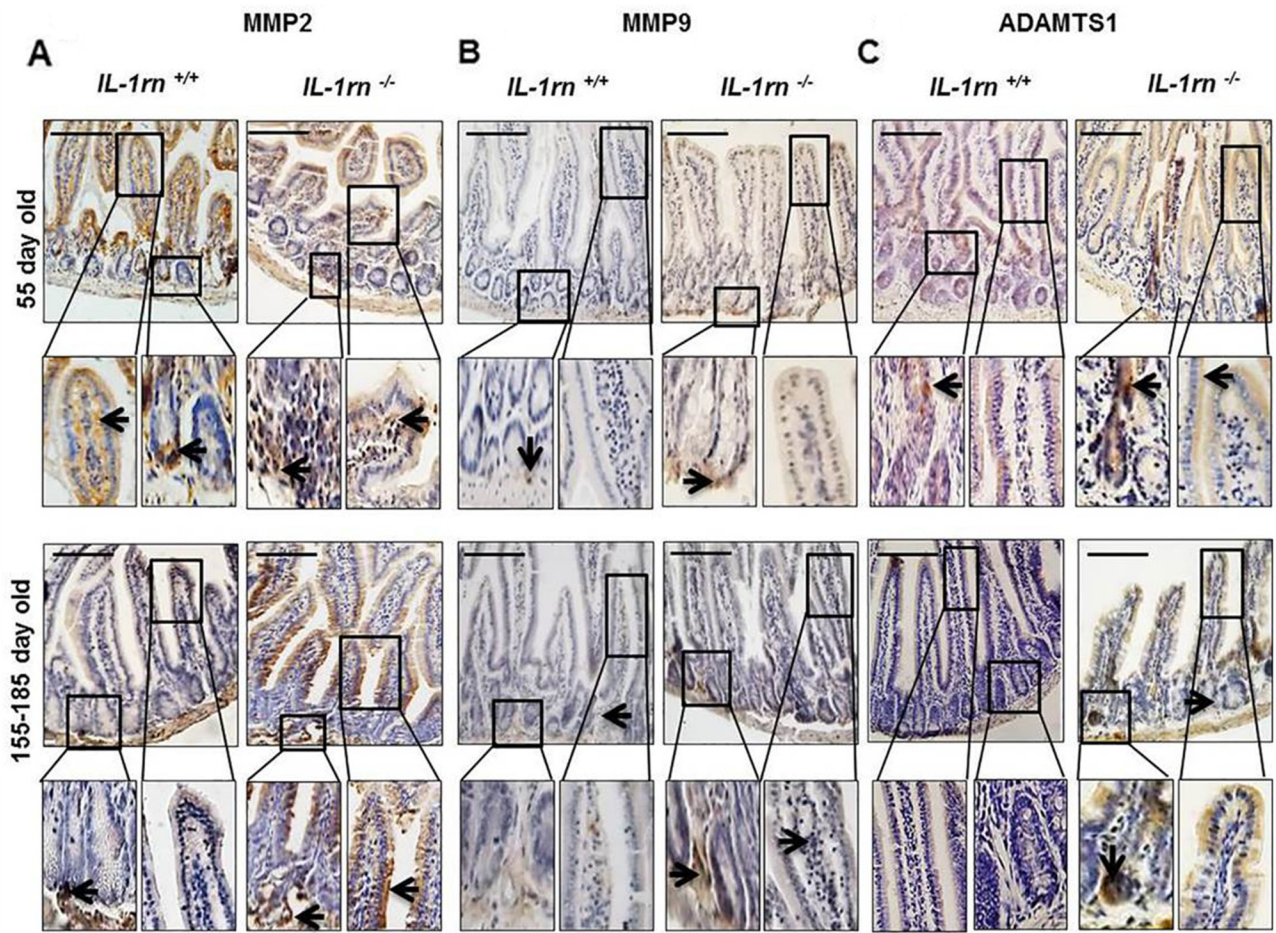

**Supplementary Figure 4: Immunohistochemistry staining of the expression and localisation of degrading enzymes. (A) MMP2; (B) MMP9; (C) ADAMTS1 in the jejunum of the 55-day old and 155-185 day old *IL-1m<sup>-/-</sup>* mice compared with *IL-1m<sup>+/+</sup>* mice. Cell nuclei were stained with haematoxylin (blue). Black arrows indicate immunopositivity. Scale bar = 100µm.**



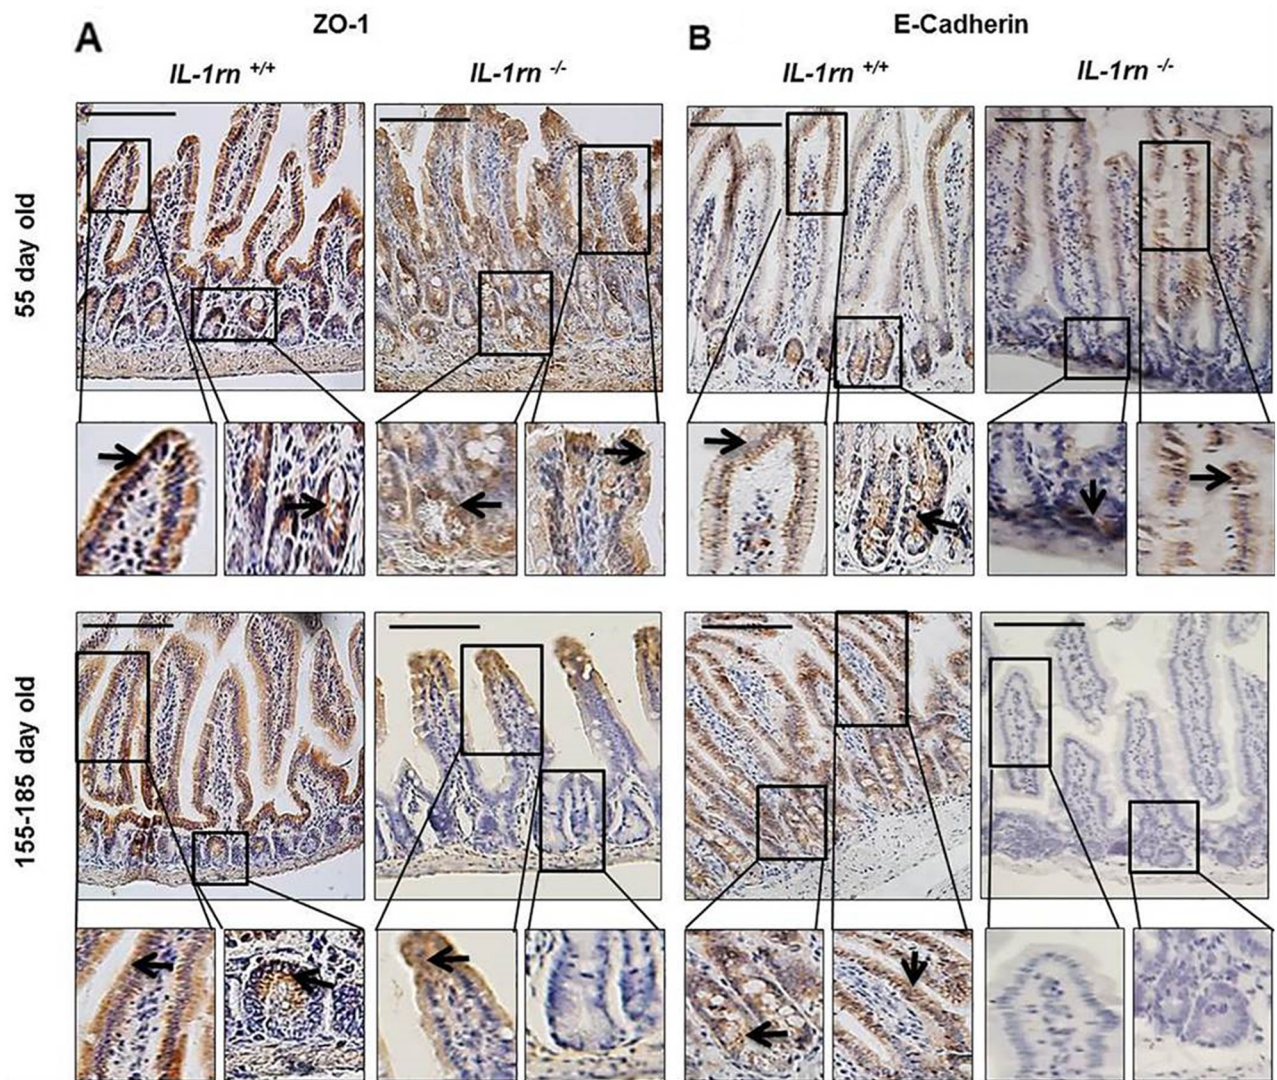

**Supplementary Figure 5: Immunohistochemistry staining of the expression and localisation of junctional proteins. (A) ZO-1; (B) E-cadherin in the jejunum of the 55-day old and 155-185 day old *IL-1m<sup>-/-</sup>* mice compared with *IL-1m<sup>+/+</sup>* mice. Cell nuclei were stained with haematoxylin (blue). Black arrows indicate immunopositivity. Scale bar = 100µm.**



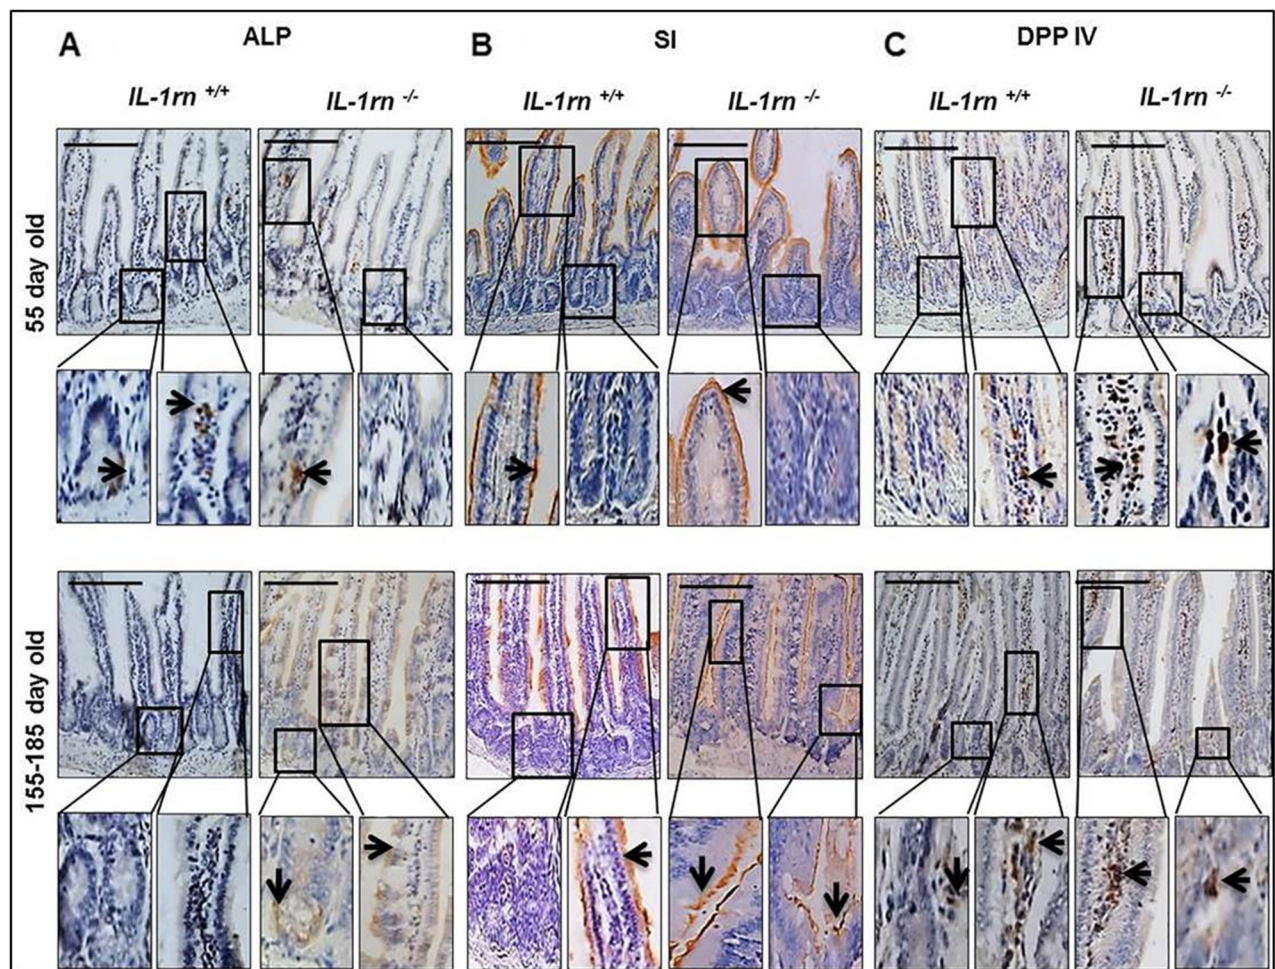

**Supplementary Figure 6: Immunohistochemistry staining of the expression and localisation of digestive enzymes. (A)** ALP; **(B)** SI and **(C)** DPP IV in the jejunum of the 55-day old and 155-185 day old IL-1m<sup>-/-</sup> mice compared with IL-1m<sup>+/+</sup> mice. Cell nuclei were stained with haematoxylin (blue). Black arrows indicate immunopositivity. Scale bar = 100µm.
